# Supplementary material
Source: bioRxiv or medRxiv preprint supplement (https://www.biorxiv.org/highwire/filestream/128751/field_highwire_adjunct_files/0/427534-1.pdf)

# Supplemental 1

Col-0 pistils

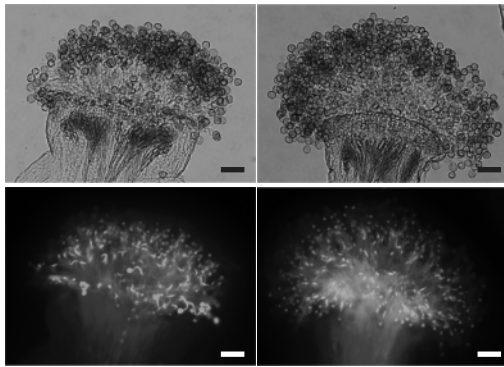

$\alpha 1$ -*copi* pistils

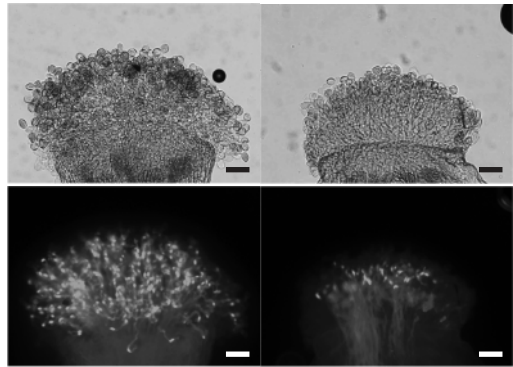

$\beta$ -*copi* allele 1 pistils

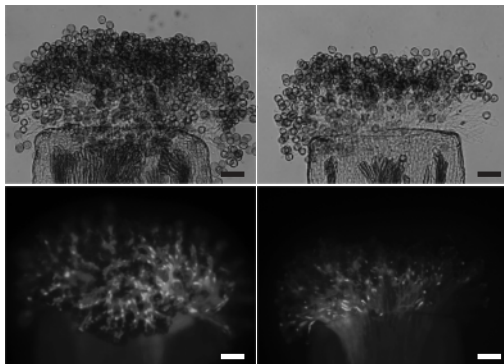

$\beta$ -*copi* allele 2 pistils

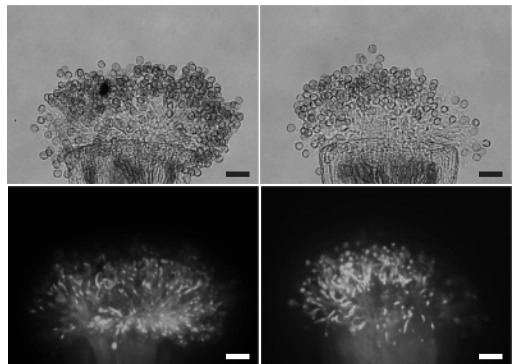

$\beta'$  1-*copi* pistils

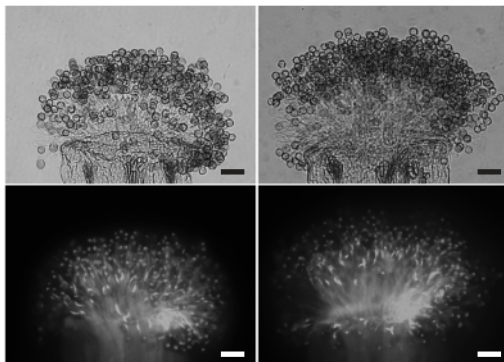

$\beta'$  2-*copi* pistils

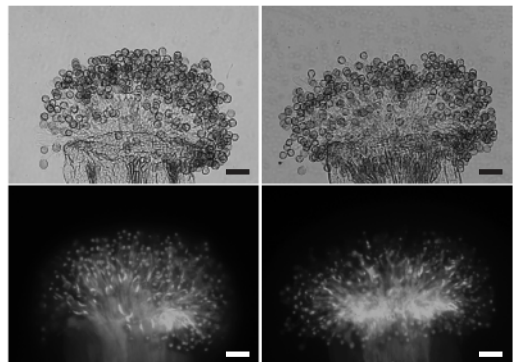

$\xi$ -*copi* pistils

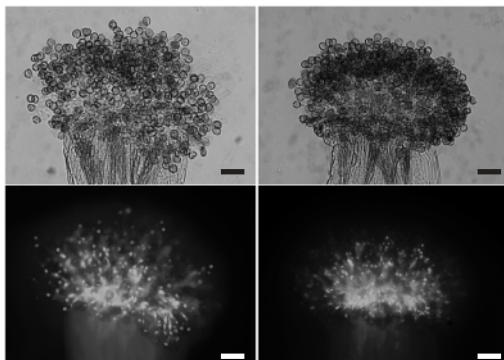

$\gamma$ -*copi* pistils

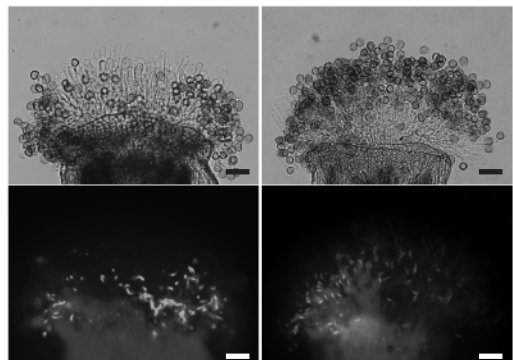

Supplement: Supplementary file [file 427534-1.pdf]
